# Supplementary material
Source: PubMed Central journal article supplement (PMC4703574)
Supplement: NIHMS690175-supplement-7.pdf [file NIHMS690175-supplement-7.pdf]

## Narayan Avadhani

---

**From:** Manti Guha <manti@vet.upenn.edu>  
**Sent:** Friday, May 01, 2015 12:16 PM  
**To:** Narayan Avadhani  
**Cc:** <satishs@vet.upenn.edu>; <ddong@mail.med.upenn.edu>;  
<whelank@mail.med.upenn.edu>; <nakagawah@mail.med.upenn.edu>;  
<goruthel@vet.upenn.edu>; <just-u@m.kufm.kagoshima-u.ac.jp>;  
<natsugoe@m2.kufm.kagoshima-u.ac.jp>  
**Subject:** Re: REvised MS for Oncogene

Dear Dr. Avadhani,

I agree to the changes in the author list of the revised version of this manuscript.  
Thanks for the opportunity to contribute to this manuscript.

Thanks,  
Manti

On May 1, 2015, at 12:01 PM, Narayan Avadhani <[narayan@vet.upenn.edu](mailto:narayan@vet.upenn.edu)> wrote:

Dear Colleagues:

We are preparing to resubmit the revised Oncogene MS. The revised version contains authors not listed in the original version. According to the journal policy, we need a consent for this change from all the authors. To speed up the process, please send me a short e-mail saying that you agree to the change in the author list and that I have full consent for submitting the manuscript.

Thank you.

Narayan G. Avadhani  
Harriet Ellison Woodward Professor of Biochemistry  
Department of Biomedical Sciences  
University of Pennsylvania

<Revised Oncogene manuscript.pdf>

## **Narayan Avadhani**

---

**From:** Satish Srinivasan <satishs@vet.upenn.edu>  
**Sent:** Friday, May 01, 2015 12:09 PM  
**To:** Narayan Avadhani  
**Subject:** Re: REvised MS for Oncogene

I agree to the changes in the author list.  
Satish Srinivasan

---

Dear Colleagues:

We are preparing to resubmit the revised Oncogene MS. The revised version contains authors not listed in the original version. According to the journal policy, we need a consent for this change from all the authors. To speed up the process, please send me a short e-mail saying that you agree to the change in the author list and that I have full consent for submitting the manuscript.

Thank you.

Narayan G. Avadhani  
Harriet Ellison Woodward Professor of Biochemistry  
Department of Biomedical Sciences  
University of Pennsylvania

**Narayan Avadhani**

---

**From:** just.uchikado@gmail.com on behalf of Yasuto Uchikado <just-u@m.kufm.kagoshima-u.ac.jp>  
**Sent:** Saturday, May 02, 2015 8:30 PM  
**To:** Narayan Avadhani  
**Subject:** Re: REvised MS for Oncogene

Dear Narayan,

Thank you for your email. I agree to the change in the author list and that I have full consent for submitting the manuscript.

Best wishes,

Yasuto Uchikado, MD, PhD

2015-05-02 1:01 GMT+09:00 Narayan Avadhani <[narayan@vet.upenn.edu](mailto:narayan@vet.upenn.edu)>:

Dear Colleagues:

We are preparing to resubmit the revised Oncogene MS. The revised version contains authors not listed in the original version. According to the journal policy, we need a consent for this change from all the authors. To speed up the process, please send me a short e-mail saying that you agree to the change in the author list and that I have full consent for submitting the manuscript.

Thank you.

Narayan G. Avadhani

Harriet Ellison Woodward Professor of Biochemistry

Department of Biomedical Sciences

University of Pennsylvania

--

\*\*\*\*\*

Yasuo Uchikado

## Narayan Avadhani

---

**From:** Hiroshi Nakagawa <nakagawh@mail.med.upenn.edu>  
**Sent:** Friday, May 01, 2015 1:04 PM  
**To:** Narayan Avadhani  
**Subject:** Re: REvised MS for Oncogene

Dear Narayan,

Thank you for your email. I agree to the change in the author list and that I have full consent for submitting the manuscript.

Best wishes,

Hiro

Hiroshi Nakagawa, MD, PhD  
Research Associate Professor of Medicine Associate Director, Cell Culture Core Division of Gastroenterology Department of Medicine Perelman School of Medicine University of Pennsylvania  
956 Biomedical Research Building  
421 Curie Boulevard  
Philadelphia, PA 19104-6160  
215-573-1867  
215-573-2024 (fax)  
[nakagawh@mail.med.upenn.edu](mailto:nakagawh@mail.med.upenn.edu)

----- Original Message -----

From: "Kelly Whelan" <[whelank@mail.med.upenn.edu](mailto:whelank@mail.med.upenn.edu)>  
To: "Hiroshi Nakagawa" <[nakagawh@mail.med.upenn.edu](mailto:nakagawh@mail.med.upenn.edu)>  
Sent: Friday, May 1, 2015 12:41:03 PM  
Subject: Fwd: REvised MS for Oncogene

----- Forwarded Message -----

From: Narayan Avadhani <[narayan@vet.upenn.edu](mailto:narayan@vet.upenn.edu)>  
To: [satishs@vet.upenn.edu](mailto:satishs@vet.upenn.edu), [manti@vet.upenn.edu](mailto:manti@vet.upenn.edu), [ddong@mail.med.upenn.edu](mailto:ddong@mail.med.upenn.edu), [whelank@mail.med.upenn.edu](mailto:whelank@mail.med.upenn.edu), [nakagawah@mail.med.upenn.edu](mailto:nakagawah@mail.med.upenn.edu), [goruthel@vet.upenn.edu](mailto:goruthel@vet.upenn.edu), [just-u@m.kufm.kagoshima-u.ac.jp](mailto:just-u@m.kufm.kagoshima-u.ac.jp), [natsugoe@m2.kufm.kagoshima-u.ac.jp](mailto:natsugoe@m2.kufm.kagoshima-u.ac.jp)  
Sent: Fri, 01 May 2015 12:01:05 -0400 (EDT)  
Subject: REvised MS for Oncogene

Dear Colleagues:

We are preparing to resubmit the revised Oncogene MS. The revised version contains authors not listed in the original version. According to the journal policy, we need a consent for this change from all the authors. To speed up the process, please send me a short e-mail saying that you agree to the change in the author list and that I have full consent for submitting the manuscript.

## Narayan Avadhani

---

**From:** Shoji Natsugoe <natsugoe@m2.kufm.kagoshima-u.ac.jp>  
**Sent:** Friday, May 01, 2015 11:39 PM  
**To:** narayan@vet.upenn.edu  
**Subject:** I agree

Dear Narayan,

Thank you for your email. I agree to the change in the author list and that I have full consent for submitting the manuscript.

Best wishes,

Shoji Natsugoe, MD, PhD

\*\*\*\*\*

Shoji Natsugoe  
Professor and Chairman  
Department of Digestive Surgery, and Breast and Thyroid Surgery  
Kagoshima University School of Medicine,  
8-35-1 Sakuragaoka, Kagoshima 890-8520, Japan  
[TEL:+81-99-275-5359](tel:+81-99-275-5359)  
FAX:+81-99-265-7426  
e-mail:natsugoe@m2.kufm.kagoshima-u.ac.jp

\*\*\*\*\*

## Narayan Avadhani

---

**From:** Kelly Whelan <whelank@mail.med.upenn.edu>  
**Sent:** Friday, May 01, 2015 12:33 PM  
**To:** Narayan Avadhani  
**Cc:** satishs@vet.upenn.edu; manti@vet.upenn.edu; ddong@mail.med.upenn.edu; nakagawah@mail.med.upenn.edu; goruthel@vet.upenn.edu; just-u@m.kufm.kagoshima-u.ac.jp; natsugoe@m2.kufm.kagoshima-u.ac.jp  
**Subject:** Re: REvised MS for Oncogene

Hello Dr. Avadhani,

I agree with the changes in the author list and you have my full consent to submit the manuscript.

Best,  
Kelly

----- Original Message -----

From: Narayan Avadhani <[narayan@vet.upenn.edu](mailto:narayan@vet.upenn.edu)>

To: [satishs@vet.upenn.edu](mailto:satishs@vet.upenn.edu), [manti@vet.upenn.edu](mailto:manti@vet.upenn.edu), [ddong@mail.med.upenn.edu](mailto:ddong@mail.med.upenn.edu), [whelank@mail.med.upenn.edu](mailto:whelank@mail.med.upenn.edu), [nakagawah@mail.med.upenn.edu](mailto:nakagawah@mail.med.upenn.edu), [goruthel@vet.upenn.edu](mailto:goruthel@vet.upenn.edu), [just-u@m.kufm.kagoshima-u.ac.jp](mailto:just-u@m.kufm.kagoshima-u.ac.jp), [natsugoe@m2.kufm.kagoshima-u.ac.jp](mailto:natsugoe@m2.kufm.kagoshima-u.ac.jp)

Sent: Fri, 01 May 2015 12:01:05 -0400 (EDT)

Subject: REvised MS for Oncogene

Dear Colleagues:

We are preparing to resubmit the revised Oncogene MS. The revised version contains authors not listed in the original version. According to the journal policy, we need a consent for this change from all the authors. To speed up the process, please send me a short e-mail saying that you agree to the change in the author list and that I have full consent for submitting the manuscript.

Thank you.

Narayan G. Avadhani

Harriet Ellison Woodward Professor of Biochemistry

Department of Biomedical Sciences

University of Pennsylvania

**Zimbra****satishs@zimbra.upenn.edu**

---

**FW: REvised MS for Oncogene**

---

**From :** Narayan Avadhani <narayan@vet.upenn.edu> Mon, May 04, 2015 11:39 AM  
**Subject :** FW: REvised MS for Oncogene  
**To :** satishs@vet.upenn.edu

[Here is Dawie's consent.](#)

NGA

---

**From:** Dawei Dong [mailto:ddong@mail.med.upenn.edu]  
**Sent:** Friday, May 01, 2015 4:25 PM  
**To:** Narayan Avadhani  
**Subject:** Re: REvised MS for Oncogene

Dear Dr. Avadhani,

I agree to the changes in the author list of the revised version of this manuscript.

Thanks,

Dawei

On Fri, 2015-05-01 at 12:01 -0400, Narayan Avadhani wrote:  
Dear Colleagues:

We are preparing to resubmit the revised Oncogene MS. The revised version contains authors not listed in the original version. According to the journal policy, we need a consent for this change from all the authors. To speed up the process, please send me a short e-mail saying that you agree to the change in the author list and that I have full consent for submitting the manuscript.

Thank you.

Narayan G. Avadhani

Harriet Ellison Woodward Professor of Biochemistry

Department of Biomedical Sciences

University of Pennsylvania

--

Dawei W. Dong, Ph.D.

Department of Animal Biology

School of Veterinary Medicine

University of Pennsylvania

122B Anatomy–Chemistry Building

3620 Hamilton Walk

Philadelphia, PA 19104–6110

215-898-9228 (office)

561-703-9039 (cell)

[ddong@mail.med.upenn.edu](mailto:ddong@mail.med.upenn.edu)

<http://dove.med.upenn.edu/~dawei>

---
